# Supplementary material for: Improved cyclability of lithium-ion battery anode using encapsulated V2O3 nanostructures in well-graphitized carbon fiber
Source: Royal Society of Chemistry journal article supplement (doi:10.1039/c2ra20472j), 2012-01-01
Supplement: c2ra20472j.pdf [file c2ra20472j.pdf]

## Supplementary Information

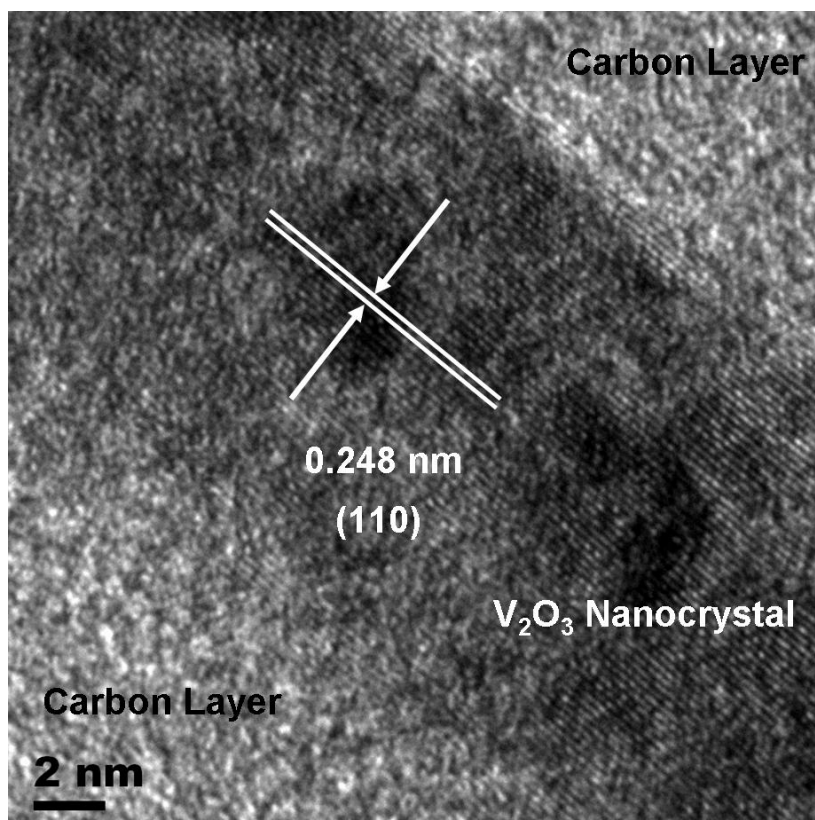

S.I. Fig. 1 The crystal lattices of the encapsulated V<sub>2</sub>O<sub>3</sub> nanostructures are clearly determined by high-resolution TEM (HRTEM) technique.

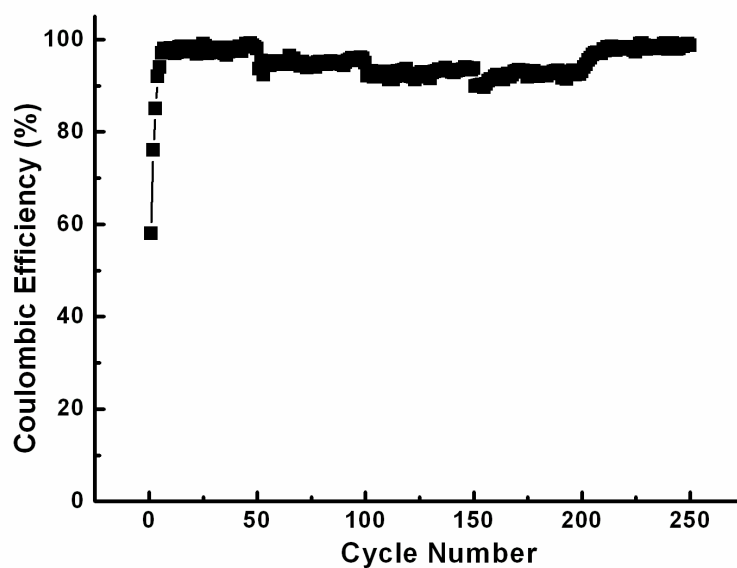

S.I. Fig. 2 Coulombic efficiency (CE) for the charge-discharge processes as shown in fig. 7c is demonstrated, where we can see the enhanced CE normally above 93% except for the first few cycles.
